# Supplementary material
Source: publisher figshare collection journal article supplement (https://tandf.figshare.com/ndownloader/files/38310805)
Supplement: Supplementary file 1 [file 38310805]

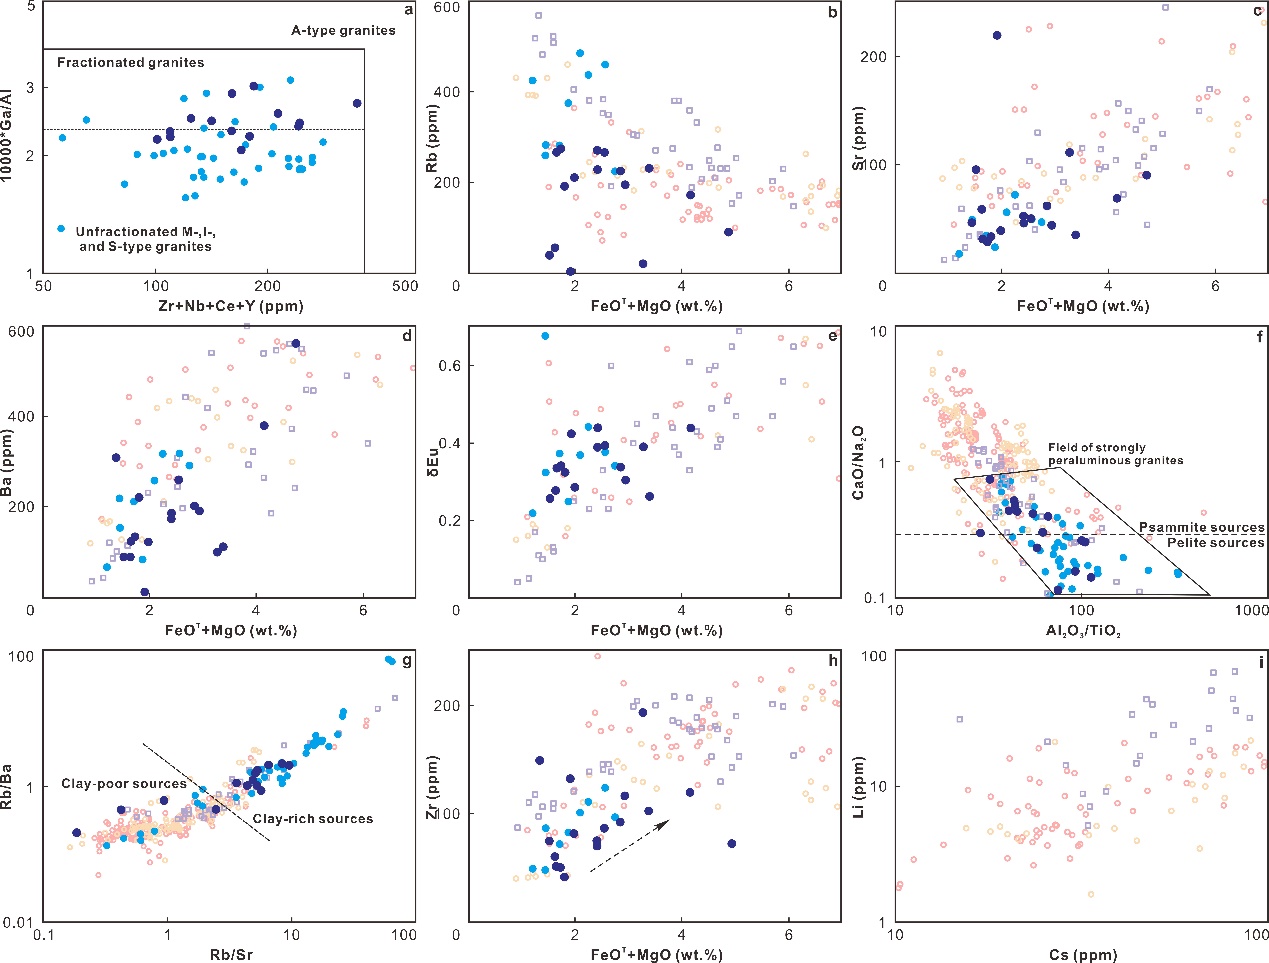


Supp. Fig. 3 Variation diagrams of (a) 10000Ga/Al vs. Zr+Nb+Ce+Y (Eby, 1990) and (b-e) Rb, Sr, Ba, and δEu vs. FeOT+MgO. Chemical discrimination diagrams of (f) CaO/Na2O vs. Al2O3/TiO2 (Sylvester, 1998) and (g) Rb/Ba vs. Rb/Sr (Sylvester, 1998). Variation diagrams of (h) Zr vs. FeOT+MgO, (i) Li vs. Cs.

**References**

Eby, G.N., 1990. The A-type granitoids: A review of their occurrence and chemical characteristics and speculations on their petrogenesis. Lithos 26 (1–2), 115–134.

Sylvester, P.J., 1998. Post-collisional strongly peraluminous granites. Lithos 45, 29–44.
